# Supplementary material
Source: Springer Nature journal article supplement (https://www.springermedizin.de/resource/supplementary/13054_2013_2231_MOESM1_ESM.pdf/9713856)
Supplement: MOESM1 [file 9713856]

| Survivor/Non-survivor | SOFA (a) | SOFA (f) | Mmp (a)     | Mmp (f)     | Day (f) | Day DC/D |
|-----------------------|----------|----------|-------------|-------------|---------|----------|
| Non-survivor          | 14       | 11       | 0.164±0.015 | 0.251±0.023 | 14      | 30       |
| Non-survivor          | 6        | 9        | 0.224±0.017 | 0.340±0.030 | 9       | 14       |
| Non-survivor          | 11       | 10       | 0.112±0.007 | 0.126±0.012 | 3       | 5        |
| Non-survivor          | 10       | 11       | 0.178±0.012 | 0.211±0.021 | 4       | 7        |
| Non-survivor          | 8        | 7        | 0.155±0.003 | 0.426±0.025 | 13      | 17       |
| Non-survivor          | 9        | 10       | 0.118±0.012 | 0.270±0.014 | 14      | 28       |
| Non-survivor          | 7        | 9        | 0.252±0.017 | 0.269±0.019 | 14      | 21       |
| Survivor              | 12       | 2        | 0.110±0.009 | 0.690±0.053 | 13      | 21       |
| Survivor              | 4        | 1        | 0.564±0.006 | 0.524±0.034 | 4       | 6        |
| Survivor              | 6        | 1        | 0.424±0.038 | 0.870±0.038 | 3       | 6        |
| Survivor              | 5        | 1        | 0.125±0.007 | 1.324±0.093 | 3       | 3        |
| Survivor              | 3        | 0        | 0.422±0.018 | 0.979±0.042 | 3       | 4        |
| Survivor              | 5        | 2        | 0.228±0.009 | 0.575±0.045 | 5       | 8        |
| Survivor              | 13       | 1        | 0.120±0.010 | 1.032±0.085 | 11      | 18       |
| Survivor              | 3        | 0        | 0.457±0.023 | 0.935±0.062 | 4       | 5        |
| Survivor              | 13       | 2        | 0.241±0.005 | 0.786±0.037 | 7       | 11       |
| Survivor              | 5        | 0        | 0.152±0.014 | 1.111±0.055 | 3       | 6        |
